# Supplementary material for: Grazing Intensity Has More Effect on the Potential Nitrification Activity Than the Potential Denitrification Activity in An Alpine Meadow
Source: MDPI journal article supplement (doi:10.3390/agriculture12101521), 2022-09-22
Supplement: s1 [file s1]

# **Grazing intensity has more effect on the potential nitrification activity than the potential denitrification activity in an alpine meadow**

**Jingyi Dong<sup>1,#</sup>, Liming Tian<sup>2,#</sup>, Jiaqi Zhang<sup>1</sup>, Yinghui Liu<sup>1,\*</sup>, Haiyan Li<sup>1</sup>, Qi Dong<sup>1</sup>**

<sup>1</sup>State Key Laboratory of Earth Surface Processes and Resource Ecology, Faculty of Geographical Science, Beijing Normal University, Beijing 100875, China

<sup>2</sup>Sichuan Zoige Alpine Wetland Ecosystem National Observation and Research Station, Key Laboratory for Bio-resource and Eco-environment of Ministry of Education, College of Life Sciences, Sichuan University, Chengdu 610064, China

# These authors contributed equally to this work.

\* Correspondence: lyh@bnu.edu.cn; Tel.: 010-58804136

Contents:

- Appendix tables and figures

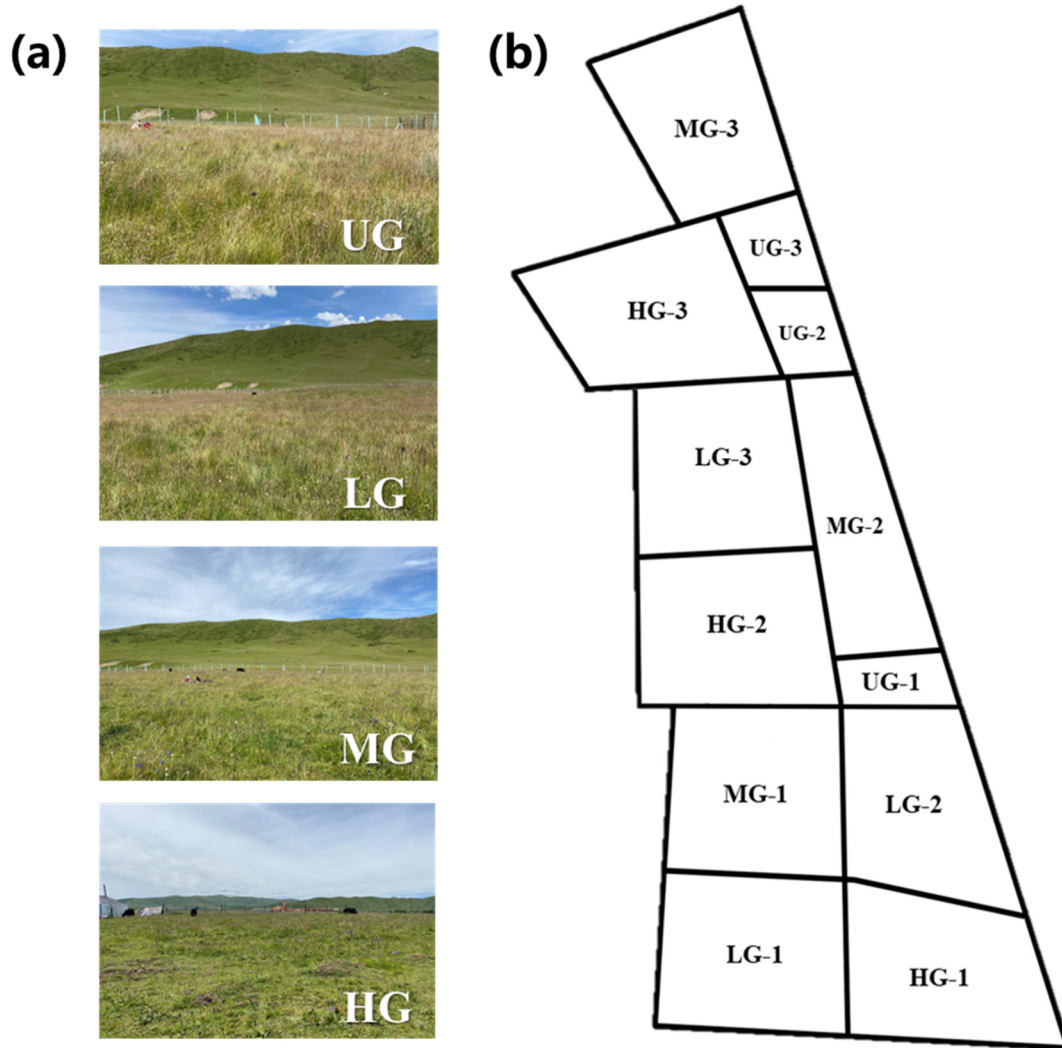

**Figure S1** The grazing experiment in alpine meadow of the Qinghai-Tibet Plateau. (a) showed the vegetation condition of the grazing plot under different grazing intensities. (b) is the layout of the experimental site [1]. The plots were divided into four grazing intensities. UG, un-grazed; LG, light grazing; MG, moderate grazing; HG, heavy grazing. Each grazing intensity consists of three replicates.

**Table S1** Primer pairs and amplification conditions.

| Target gene | Primer set          | Amplicon length (bp) | Sequence (5'-3')      | Annealing temperature | Reference                    |
|-------------|---------------------|----------------------|-----------------------|-----------------------|------------------------------|
| AOA         | Arch- <i>amoA</i> F | 643                  | STAATGGTCTGGCTTAG     | 55°C                  | Francis, <i>et al.</i> [2]   |
|             | Arch- <i>amoA</i> R |                      | GCGGCCATCCATCTGTA     |                       |                              |
| AOB         | <i>amoA</i> -1F     | 491                  | GGGGTTTCTACTGGTGGT    | 55°C                  | Rotthauwe, <i>et al.</i> [3] |
|             | <i>amoA</i> -2R     |                      | CCCCTCKGSAAAGCCTTCTTC |                       |                              |
| <i>nirS</i> | cd3Af               | 425                  | GTSAACGTSAAAGGARACSGG | 58°C                  | Throbäck, <i>et al.</i> [4]  |
|             | R3cd                |                      | GASTTCGGRTGSGTCTTGA   |                       |                              |
| <i>nirK</i> | F1aCu               | 487                  | ATCATGGTSCTGCCGCG     | 58°C                  | Hallin and Lindgren [5]      |
|             | R3Cu                |                      | GCCTCGATCAGRTTGTGGTT  |                       |                              |
| <i>nosZ</i> | nosZ2F              | 267                  | CGCRACGGCAASAAG       | 60°C                  | Henry, <i>et al.</i> [6]     |
|             | nosZ2R              |                      | CAKRTGCAKSGCRTGGC     |                       |                              |

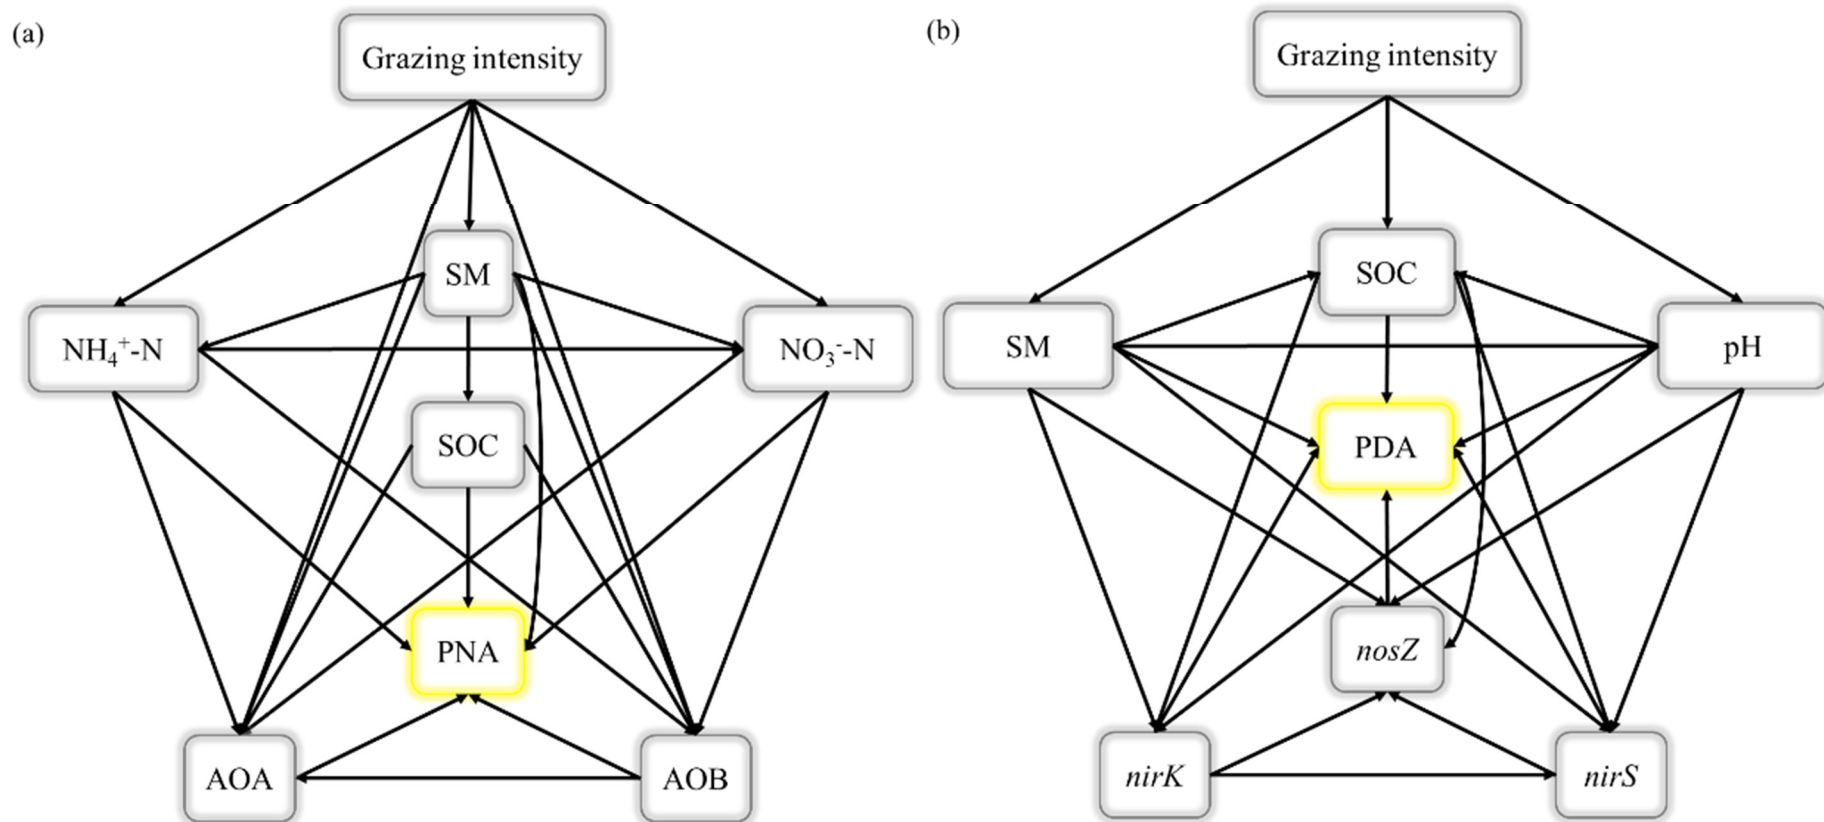

**Figure S2** The priori structural equation model (SEM) of the relationship between PNA (a), PDA (b) and its main influencing factors in alpine meadow. The priori SEM was established based on the known effects among the abiotic and biotic predictors, PNA and PDA.

## Reference

1. Mipam, T.; Zhong, L.; Liu, J.; Miehe, G.; Tian, L. Productive overcompensation of alpine meadows in response to yak grazing in the eastern Qinghai-Tibet plateau. *Frontiers in Plant Science* **2019**, *10*, 925, doi:<https://doi.org/10.3389/fpls.2019.00925>.
2. Francis, C.A.; Roberts, K.J.; Beman, J.M.; Santoro, A.E.; Oakley, B.B. Ubiquity and diversity of ammonia-oxidizing archaea in water columns and sediments of the ocean. *Proceedings of the National Academy of Sciences* **2005**, *102*, 14683-14688, doi:<https://doi.org/10.1073/pnas.0506625102>.
3. Rothauwe, J.H.; Witzel, K.P.; Liesack, W. The ammonia monooxygenase structural gene *amoA* as a functional marker: molecular fine-scale analysis of natural ammonia-oxidizing populations. *Applied and Environmental Microbiology* **1997**, *63*, 4704-5712, doi:<https://doi.org/10.1128/aem.63.12.4704-4712.1997>.
4. Throbäck, I.N.; Enwall, K.; Jarvis, Å.; Hallin, S. Reassessing PCR primers targeting *nirS*, *nirK* and *nosZ* genes for community surveys of denitrifying bacteria with DGGE. *FEMS Microbiology Ecology* **2004**, *49*, 401-417, doi:<https://doi.org/10.1016/j.femsec.2004.04.011>.
5. Hallin, S.; Lindgren, P.-E. PCR detection of genes encoding nitrite reductase in denitrifying bacteria. *Applied and Environmental Microbiology* **1999**, *65*, 1652-1657, doi:<https://doi.org/10.1128/AEM.65.4.1652-1657.1999>.
6. Henry, S.; Texier, S.; Hallet, S.; Bru, D.; Dambreville, C.; Chèneby, D.; Bizouard, F.; Germon, J.C.; Philippot, L. Disentangling the rhizosphere effect on nitrate reducers and denitrifiers: insight into the role of root exudates. *Environmental Microbiology* **2008**, *10*, 3082-3092, doi:<https://doi.org/10.1111/j.1462-2920.2008.01599.x>.
